# Supplementary material for: Deciphering the Role of PIG1 and DHN-Melanin in Scedosporium apiospermum Conidia
Source: MDPI journal article supplement (doi:10.3390/jof9020134), 2023-01-18
Supplement: s1 [file s1]

# Supplementary Materials:

**Figure S1.** Fluorescence labelling of conidia surface carbohydrates with FITC-conjugated lectins.

**Table S1.** Nucleotide sequence of constructs and primers used in the study

**Table S2.** Summary of RNA-Seq quality data of M1 and its  $\Delta KU70$  parental strain. Four biological repeats were performed for each isolate.

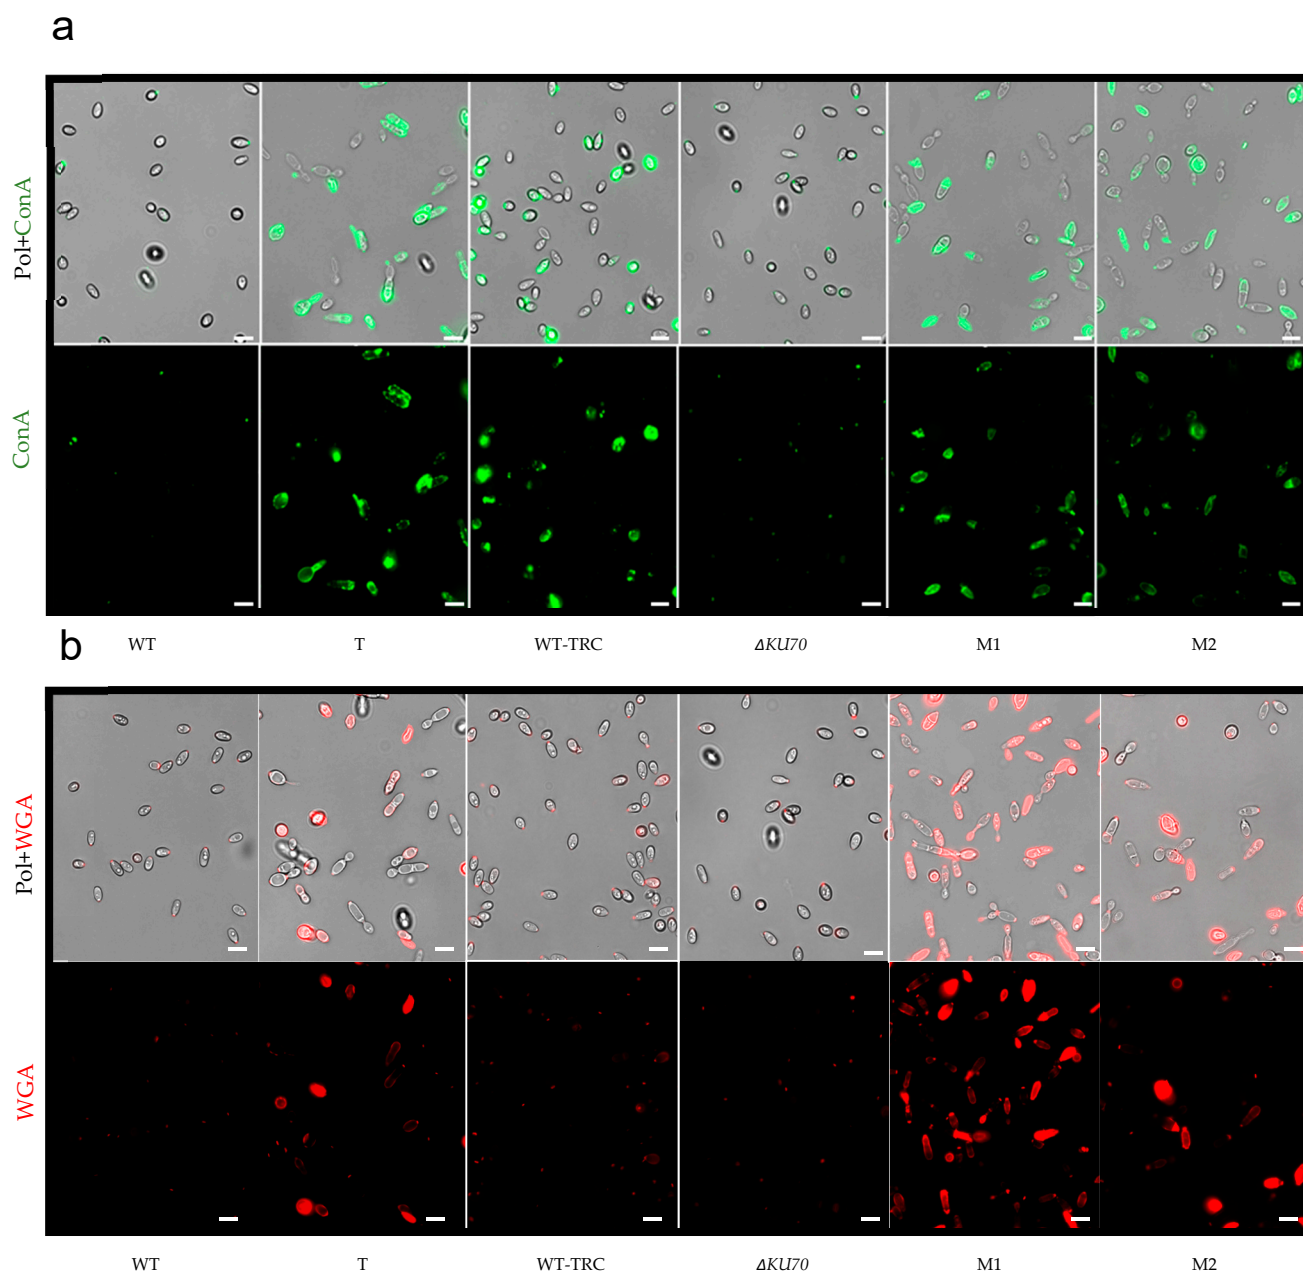

**Figure S1.** Fluorescence labelling of conidia surface carbohydrates with FITC-conjugated lectins. Representative images from fluorescence acquisition of conidia stained with Concanavalin A (**a**) or WGA (**b**), which bind to mannosyl and glucosyl residues and N-acetylglucosamine residues, respectively. Image acquired using an Olympus IX71 widefield inverted fluorescence microscope using a 20 $\times$  magnification lens. Scale bar: 10 $\mu$ m.

**Table S1.** Nucleotide sequence of constructs and primers used in the study

| Gene target                                                       | Sequence (5'-3')                                                                        | Application                                |
|-------------------------------------------------------------------|-----------------------------------------------------------------------------------------|--------------------------------------------|
| crRNA protospacer ( <i>PIG1</i> )                                 | GACGGCCAAGCAACTTGTGG                                                                    | CrispR-Cas9 construction                   |
| tracrRNA                                                          | GTTTATAGAGCTAGAAATAGCAAGTT<br>AAAATAAGGCTAGTCCGTTATCAAC<br>TTGAAAAAGTGGCA CCGAGTCGGTGCT |                                            |
| Up-stream and down-stream region of <i>PIG1</i> (SAPIO_CDS8655)   | F- TGTGACACAAGGCTTATACC<br>R- TACGAGCGAGCCTTTTGTCT                                      | PCR (verification of <i>PIG1</i> deletion) |
| <i>FIS1</i> (SAPIO_CDS7496)                                       | F-GATCAGTTCGAGAAGGAGGG<br>R- GGAAGATGTCGGAGAGGAGA                                       | RT-qPCR (RNA-seq validation)               |
| <i>UBC6</i> Ubiquitin-conjugating enzyme E2 J2 (SAPIO_CDS4581)    | F-GAGAACCCGCCACCATACA<br>R-CAATACTGGCCGCCATGGTA                                         |                                            |
| <i>PIG1</i> (SAPIO_CDS8655)                                       | F-TTTGGGTGCTTGGAGTGGGGATAA<br>R-GCCGTATCGTGGAACAAGCTCAAT                                |                                            |
| Tetrahydroxynaphthalene reductase (SAPIO_CDS8657)                 | F-GGGCAAGGTCGCTGTAGTCA<br>R-TGGGGTTGGTGCCGAAAGAC                                        |                                            |
| Polyketide synthase (SAPIO_CDS8658)                               | F- AGAAGTCGATGGCTTGACGAGG<br>R- GGCAGTCCAATCTTCAGGCTCT                                  |                                            |
| Iron transport multicopper oxidase ( <i>abr1</i> , SAPIO_CDS8659) | F-CCACCGGGCGAAAGTATTGTGT<br>R-CGTCGGGGTATTGTGCCATGTT                                    |                                            |
| Scytalone deshydratase (SAPIO_CDS5047)                            | F- CACCCTCAAGACGCAGCACT<br>R- CCCGTCCACCCTCCTATACCAA                                    |                                            |
| Peptidase C2, calpain family (SAPIO_CDS8079)                      | F-AGGTTTGCCTCGTGCTGCAT<br>R-ATCATGCGCCTTTTCATGCCCT                                      |                                            |
| Conidiation specific protein-6 (SAPIO_CDS6958)                    | F-AGATTGACACCTCTCCTAGCGCC<br>R-TGCTTCCCGTTTGGCCTCCT                                     |                                            |
| Thioredoxin reductase (SAPIO_CDS1830)                             | F-GACGTGAATCCTGCCACTTT<br>R-ACCGAGAATGTCACCCTGTA                                        |                                            |

F: forward primer, R: reverse primer

**Table S2.** Summary of RNA-Seq quality data of M1 and its  $\Delta KU70$  parental strain. Four biological repeats were performed for each isolate.

| Index                           | $\Delta KU70$ |      |      |      | M1   |      |      |      |
|---------------------------------|---------------|------|------|------|------|------|------|------|
|                                 | 1             | 2    | 3    | 4    | 1    | 2    | 3    | 4    |
| Total reads (millions)          | 17.6          | 20.6 | 20.8 | 20.7 | 19.8 | 12.7 | 20.6 | 17.3 |
| Total assigned reads (millions) | 11.7          | 12.3 | 15.0 | 14.6 | 10.4 | 9.4  | 14.6 | 11.2 |
| % assigned reads                | 66.2          | 59.8 | 71.8 | 70.3 | 70.7 | 74.1 | 70.4 | 64.7 |
| Q30%                            | 95.7          | 95.6 | 95.4 | 95.5 | 95.8 | 95.5 | 95.7 | 95.7 |
| GC%                             | 53.0          | 52.0 | 53.7 | 53.5 | 53.3 | 55.0 | 53.5 | 52.9 |

Q30%: proportion of reads with a quality value > 30 after filtering. GC%: proportion of guanine and cytosine nucleotides among total nucleotides after filtering.
